# Supplementary material for: Amphiphilic, cross-linkable diblock copolymers for multifunctionalized nanoparticles as biological probes
Source: Royal Society of Chemistry journal article supplement (doi:10.1039/c3nr01520c), 2013-01-01
Supplement: c3nr01520c.pdf [file c3nr01520c.pdf]

## Electronic Supplementary Information

# Amphiphilic, Cross-Linkable Diblock Copolymers for Multifunctionalized Nanoparticles as Biological Probes

Christian Schmidtke,\*<sup>a</sup> Elmar Pösel,<sup>a</sup> Johannes Ostermann,<sup>a</sup> Andrea Pietsch,<sup>a</sup> Hauke Kloust,<sup>a</sup> Huong Tran,<sup>a</sup> Theo Schotten,<sup>b</sup> Neus G. Bastús,<sup>a,c</sup> Robin Eggers<sup>a</sup> and Horst Weller\*<sup>a,b</sup>

<sup>a</sup> Institute of Physical Chemistry, University of Hamburg, Grindelallee 117, 20146 Hamburg, Germany. E-mail: schmidtke@chemie.uni-hamburg.de; weller@chemie.uni-hamburg.de

<sup>b</sup> Center of Applied Nanotechnology, Grindelallee 117, 20146 Hamburg, Germany.

<sup>c</sup> Current address: Institut Català de Nanotecnologia (ICN), Campus UAB, 08193 Bellaterra, Barcelona, Spain.

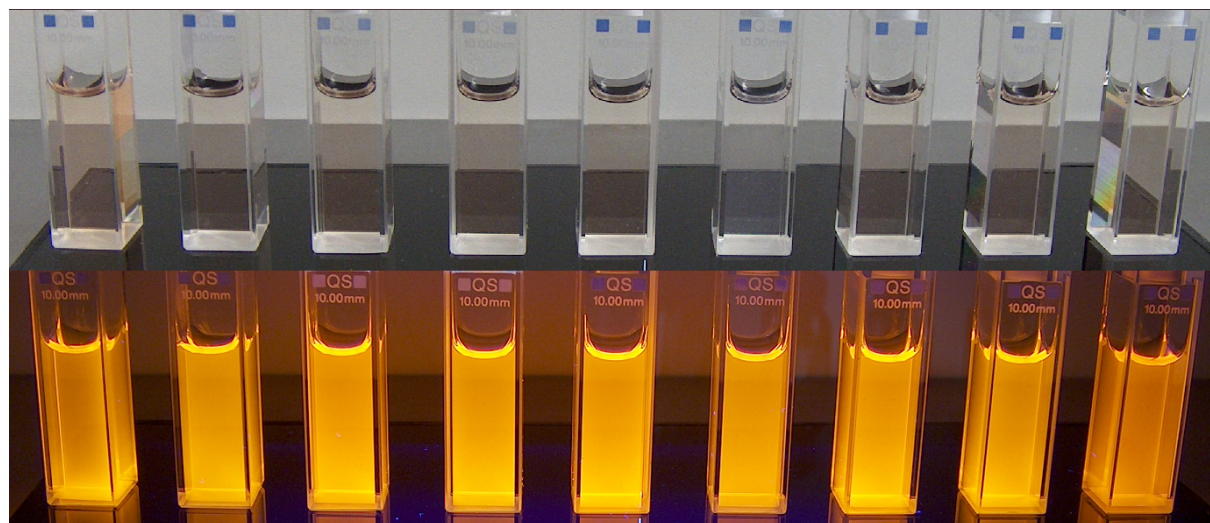

**Figure S1:** Images of PI-*b*-PEG encapsulated QDs with different end groups (from left to right: -COOH, -COOH/-OMe (3:1), -CHO, -COOH/-OMe (1:1), -OH, -OMe, -OMe/-NH<sub>2</sub> (1:1), -NH<sub>2</sub>, -(NH<sub>2</sub>)<sub>2</sub> with (bottom) and without (top) UV irradiation.

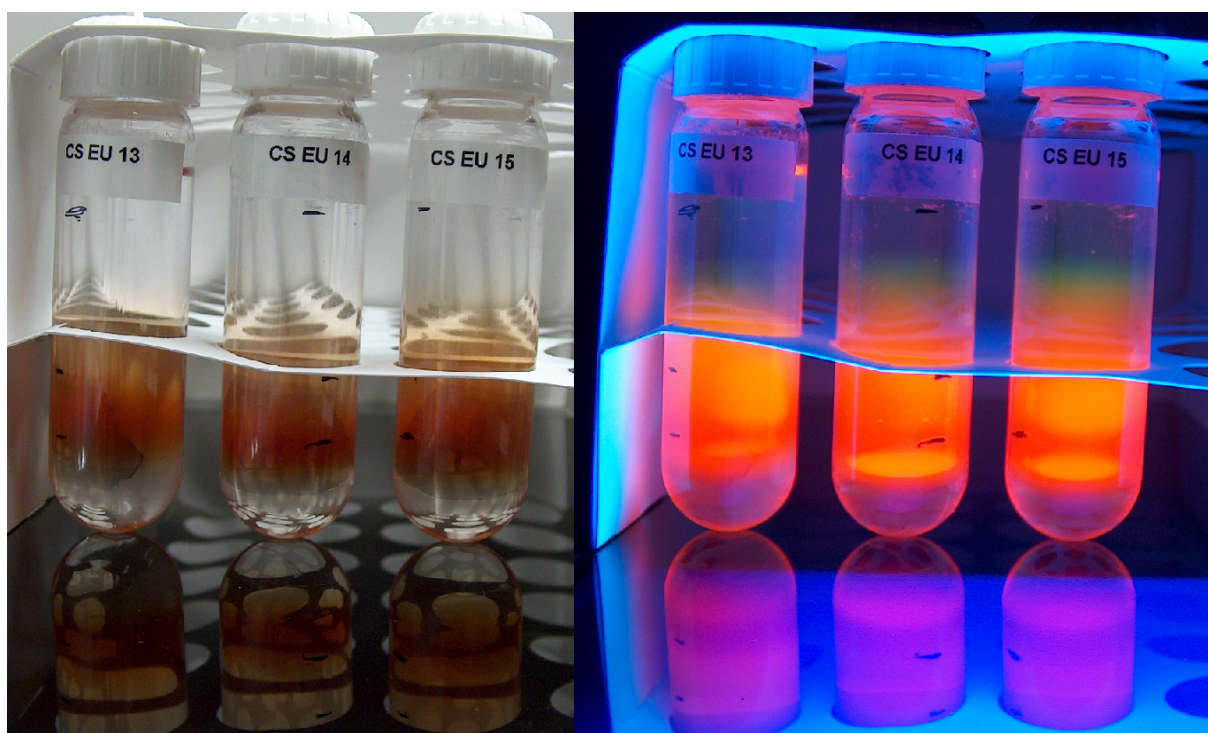

**Figure S2:** Images of PI-*b*-PEG encapsulated QDs after sucrose gradient centrifugation with (right) and without (left) UV irradiation.

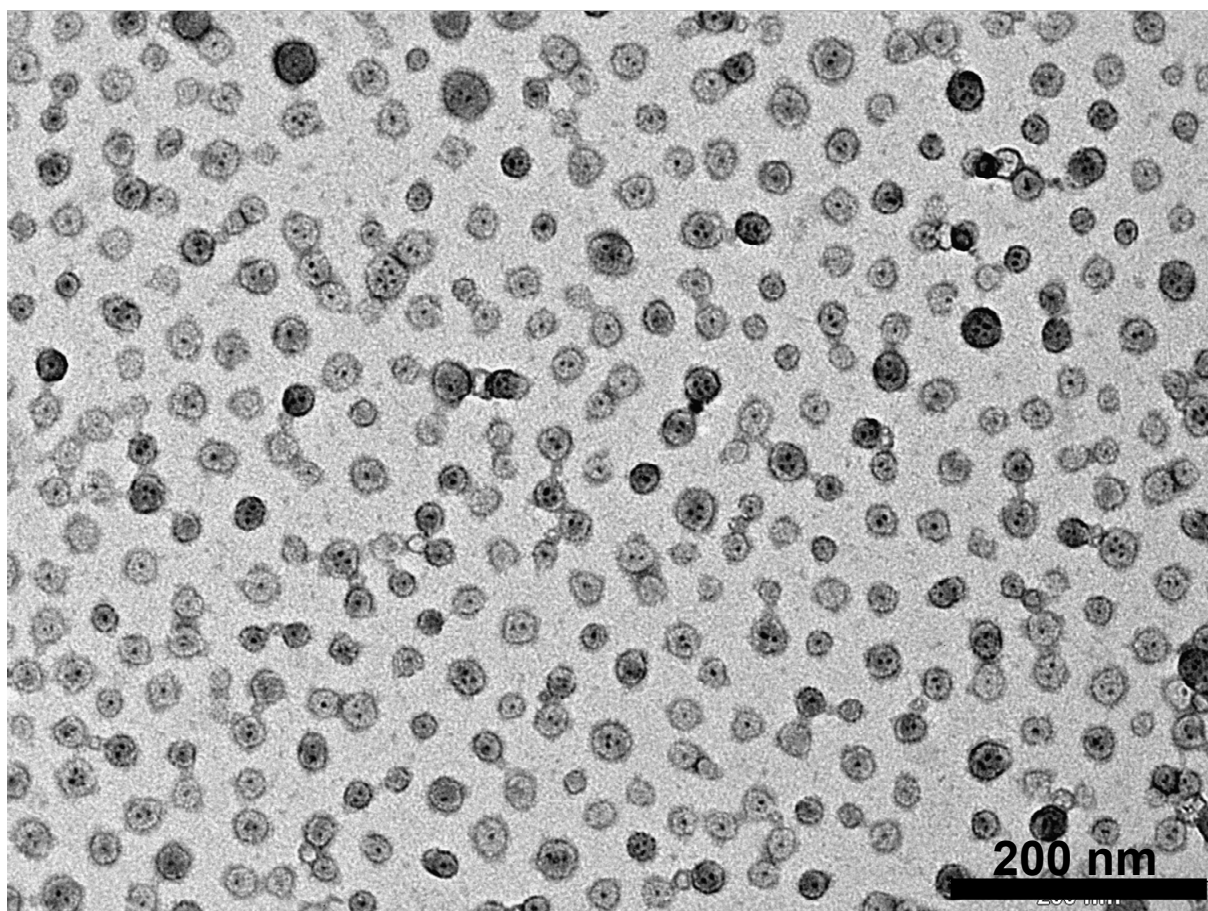

**Figure S3:** Phosphotungstic acid stained TEM image of PI-*b*-PEG encapsulated QDs after sucrose gradient and HPLC purification.

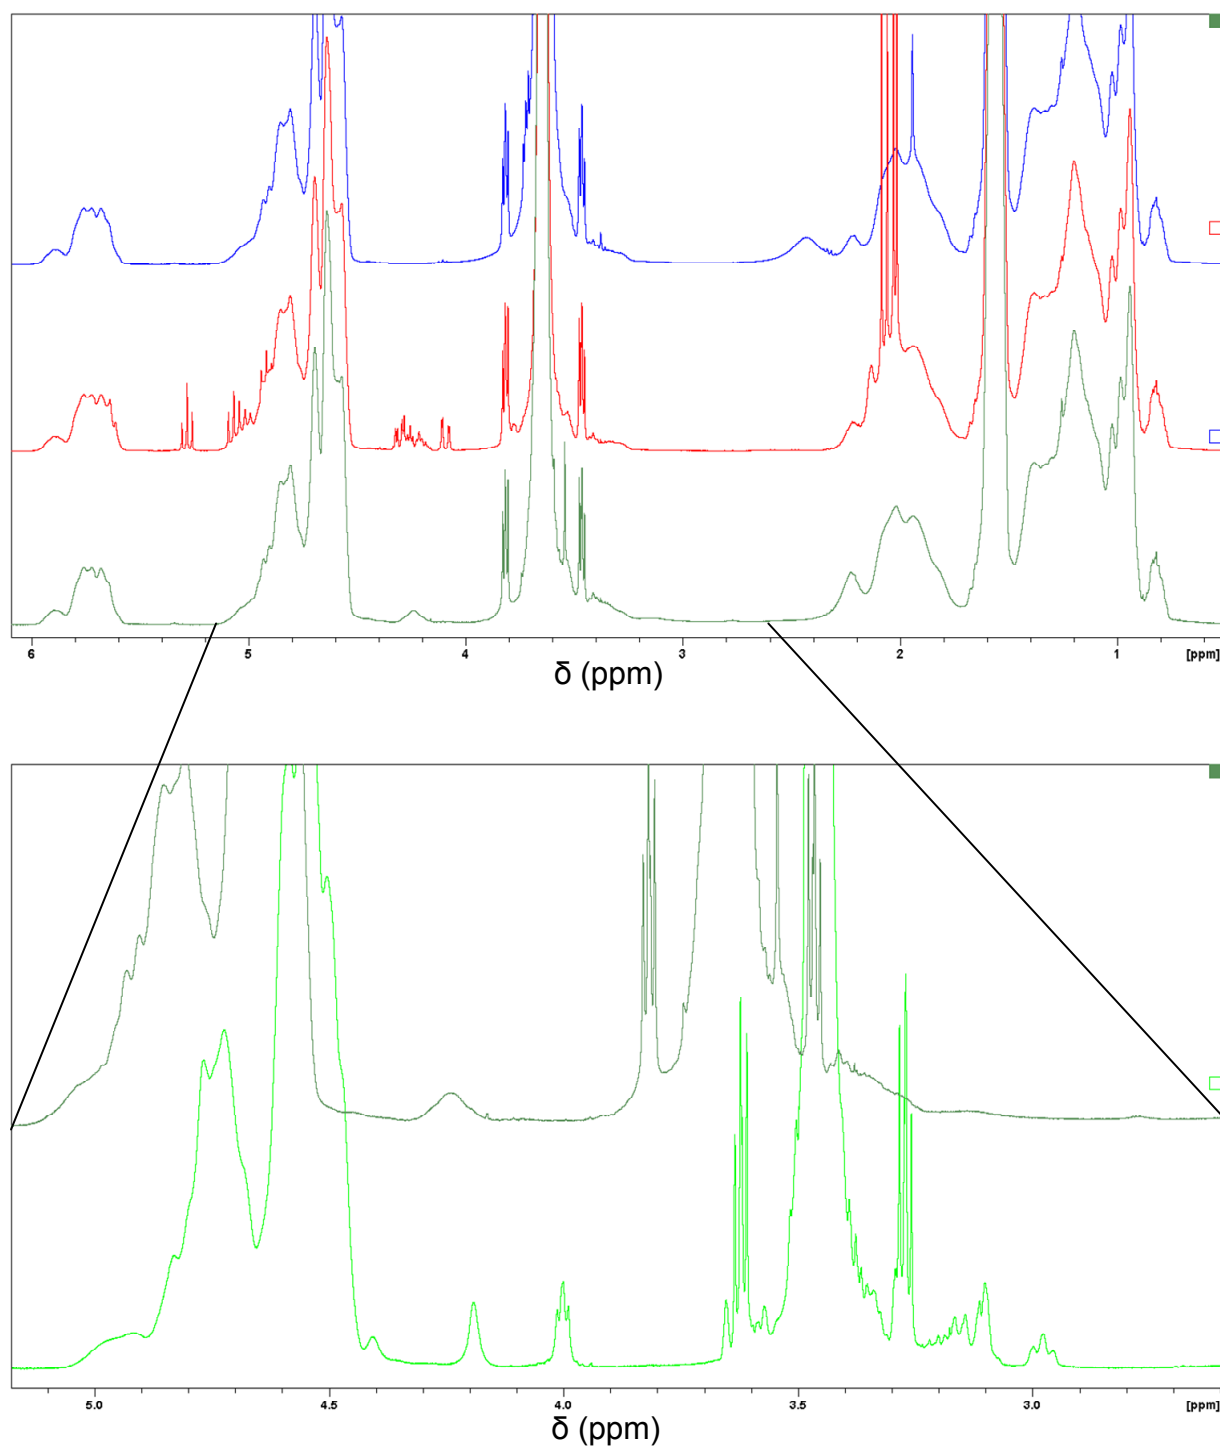

**Figure S4:** (Top) Superimposed NMR spectra of PI-*b*-PEG-OH (**5**, blue), PI-*b*-PEG-GlcAc<sub>4</sub> (**23**, red) and PI-*b*-PEG-Glc (**24**, olive) in CDCl<sub>3</sub>. (Bottom) Characteristic section of the NMR spectra of PI-*b*-PEG-Glc (**24**, olive) in CDCl<sub>3</sub> and in THF-D<sub>8</sub> (green).

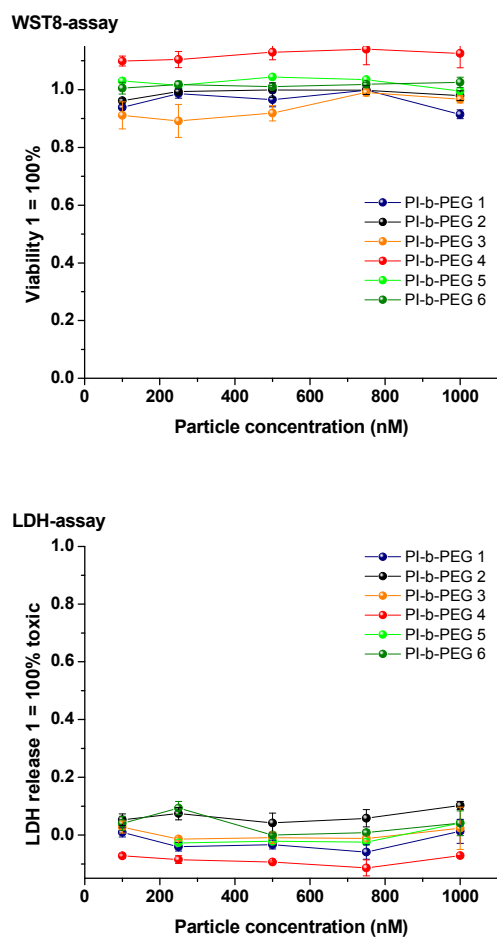

**Figure S5:** WST8- (top) and LDH-assay (bottom) of PI-*b*-PEG encapsulated QDs with different molecular weight tested on A549 cells.

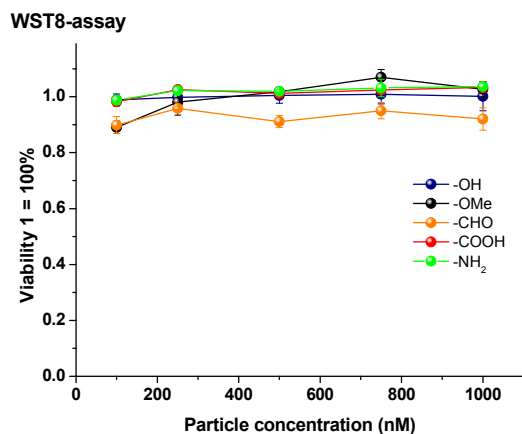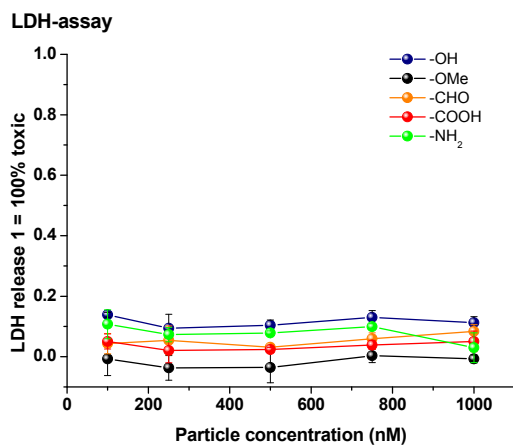

**Figure S6:** WST8- (top) and LDH-assay (bottom) of PI-*b*-PEG encapsulated FeOx-NPs with different end groups tested on A549 cells.
